# Supplementary material for: Characterization of MAO + Cu Composite Coatings on Aluminum Alloy
Source: MDPI journal article supplement (doi:10.3390/coatings11101172), 2021-09-28
Supplement: s1 [file s1]

# Supplementary Materials: Characterization of MAO + Cu Composite Coatings on Aluminum Alloy

Shang-Kun Wu, Wei Yang, Wei Gao, Yu-Hong Yao, Yong Zhang and Jian Chen

School of Materials Science and Chemical Engineering, Xi'an Technological University, Xi'an 710021, China; wushangkun\_xatu@163.com (S.-K.W.); gaowei@xatu.edu.cn (W.G.); yyhong0612@xatu.edu.cn (Y.-H.Y.); zhangyong@st.xatu.edu.cn (Y.Z.)

\* Correspondence: yangwei\_smx@163.com (W.Y.); chenjian@xatu.edu.cn (J.C.)

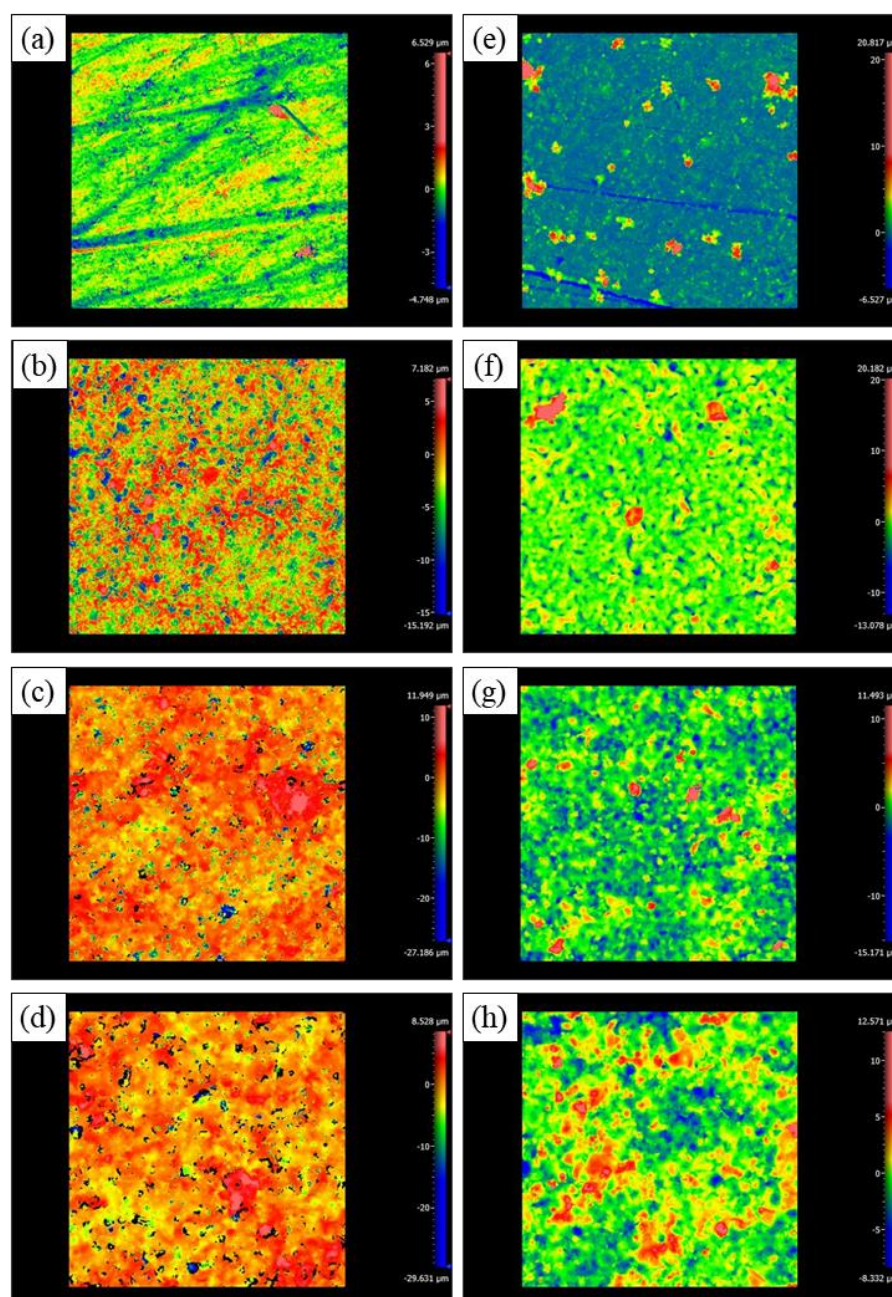

**Figure S1.** three-dimensional surface morphology of MAO coating (a–d), and MAO + Cu composite coating (e–h) .
